# Supplementary material
Source: Research Square preprint supplement (doi:10.21203/rs.3.rs-9924054/v1)
Supplement: Supplementary file 1 [file 52e48207178486bbfefffa7e.xlsx]

## Sheet: Sheet1
Chemical Small Molecule	Cytokine
C646	M-CSF
A-485	G-CSF
AZD5153	GM-CSF
JQ1	VEGF-A
I-BRD9	VEGF-B
INCB059872	VEGF-C
BAY-299	VEGF-D
SGC707	FGF1
MI503	FGF2
OICR9429	FGF4
EPZ015666	FGF5
GSK126	FGF7
UNC1999	FGF8
CPI-1205	FGF9
EHT1864	FGF10
BIX01294	FGF12
UNC0642	FGF13
UNC0638	PDGF-AA
JIB-04	PDGF-AB
IOX1	PDGF-BB
GSK-J1	EGF
KDM5-C70	HGF
CPI-455	IGF-1
GSK-J6	IGF-2
S2101	ANGPT1
A366	ANGPT2
GSK-LSD1	CNTF
ORY-1001	LIF
TCS ERK 11e	OSM
GDC-0994	BMP2
FR180204	BMP4
AZD0364	BMP6
SP600125	BMP7
CC-401	BMP9
VX-745	BMP10
PIK-75	WNT3A
TG100-115	WNT5A
BKM120	WNT7A
GDC-0941	WNT11
NVP-BEZ235
GNE-7915
Vemurafenib
Dabrafenib
Sorafenib
PLX4720
GW5074
TAK-632
LY3009120
BI-847325
CEP-32496
XAV939
CHIR99021
SB216763
BML-284
LY2109761
DMH1
Trametinib
Cobimetinib
AZD6244
CI-1040
SCH772984
Ulixertinib
VX-11e
RITA
AMG232
NSC59984
IMD-0354
BMS-345541
QNZ
TPCA-1
SC75741
IKK-16
MLN120B
MK2206
GSK690693
AZD5363
PF-04691502
PP242
Torin2
INK128
OSI-027
AZD8055
RKI1447
AZA1
IPA-3
GW4064
INT-777
T0901317
TO901317
LXR-623
PF-05212384
MLN4924
EZH2-IN-14
Nutlin-3a
RG7388
RG7112
Chaetocin
GSK343
EPZ6438
ML324
Tranylcypromine
CPI-0610
I-BET762
RG108
ORY-2001
LY294002
Wortmannin
Perifosine
SC79
AICAR
Dactolisib
GDC-0068
SB203580
BIRB796
LGK974
IWP-2
IWP-4
IWR-1
XMU-MP-1
Wnt-C59
Pyrvinium
Fasudil
Y-27632
NSC23766
ML141
Rosiglitazone
Pioglitazone
GW501516
GW0742
MK886
SR12813
SR1664
Genistein
Kaempferol
Luteolin
Niraparib
Olaparib
Palbociclib
Pterostilbene
Ribociclib
Sulforaphane
Talazoparib
VE-821
ZCL278
Apigenin
AZD6738
Baicalin
Berberine
CAPE
Carnosic acid
Carnosol
Curcumin
Dinaciclib
EGCG
Fisetin
SP2509
K02288
NCD38
MC1945
U0126
PD0325901
